# Supplementary material for: Surfactant-assisted hydrothermal synthesis of ultrafine CoMoO4·0.9H2O nanorods towards high-performance supercapacitors
Source: Royal Society of Chemistry journal article supplement (doi:10.1039/c5nj00746a), 2015-01-01
Supplement: c5nj00746a1.pdf [file c5nj00746a1.pdf]

## Supporting Information

### **Surfactant-assisted hydrothermal synthesis of ultrafine $\text{CoMoO}_4 \cdot 0.9\text{H}_2\text{O}$ nanorods towards high-performance supercapacitors**

By Linrui Hou <sup>a, \*</sup>, Hui Hua <sup>a</sup>, Sijia Liu <sup>a</sup>, Gang Pang <sup>a</sup>, Changzhou Yuan <sup>a, b \*</sup>

<sup>a</sup> School of Materials Science & Engineering, Anhui University of Technology,  
Ma'anshan, 243002, P.R. China

<sup>b</sup> Chinese Academy of Science (CAS) Key Laboratory of Materials for Energy  
Conversion, Hefei, 230026, P.R. China

Email: [hour629@163.com](mailto:hour629@163.com); [ayuancz@163.com](mailto:ayuancz@163.com)

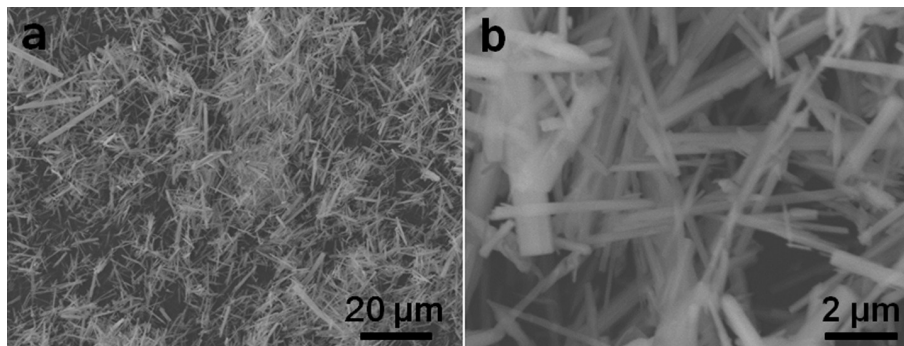

**Fig. S1** FESEM images of the CMO sample

**Table S1** X-ray diffraction intensities at  $2\theta = 29.4^\circ$  for the as-prepared samples

| Samples   | diffraction intensity |
|-----------|-----------------------|
| CMO       | ~747                  |
| CMO-CTMAB | ~240                  |
| CMO-SDS   | ~433                  |
| CMO-PEG   | ~542                  |
| CMO-PGOE  | ~642                  |
| CMO-PVP   | ~813                  |

**Table S2** SSA data of the as-prepared samples as indicated

| Samples   | SSA (cm <sup>2</sup> g <sup>-1</sup> ) |
|-----------|----------------------------------------|
| CMO       | ~73                                    |
| CMO-CTMAB | ~98                                    |
| CMO-SDS   | ~92                                    |
| CMO-PEG   | ~87                                    |
| CMO-PGOE  | ~72                                    |
| CMO-PVP   | ~70                                    |
